1 **Title: Comparative transcriptomic analysis reveals translationally relevant**  
2 **processes in mouse models of malaria**

3 **Authors:**

4 Athina Georgiadou<sup>1,2,\*</sup>, Claire Dunican<sup>1,2,\*</sup>, Pablo Soro-Barrio<sup>1,†</sup>, Hyun Jae Lee<sup>3,††</sup>, Myrsini  
5 Kaforou<sup>1,2</sup>, Aubrey J. Cunnington<sup>1,2</sup>

6

7 **Affiliations:**

8 <sup>1</sup>Section of Paediatric Infectious Disease, Department of Infectious Disease, Imperial College  
9 London, London, UK

10 <sup>2</sup>Centre for Paediatrics and Child Health, Imperial College London, London, UK

11 <sup>3</sup>Institute for Molecular Bioscience, University of Queensland, Brisbane, Queensland,  
12 Australia.

13 \* Equal contribution

14 † Present address: The Francis Crick Institute, London, UK

15 †† Present address: The Peter Doherty Institute for Infection and Immunity, Melbourne,  
16 Australia

17

18 **Abstract**

19 Recent initiatives to improve translation of findings from animal models to human disease  
20 have focussed on reproducibility but quantifying the relevance of animal models remains a

21 challenge. Here we use comparative transcriptomics of blood to evaluate the systemic host  
22 response and its concordance between humans with different clinical manifestations of  
23 malaria and five commonly used mouse models. *Plasmodium yoelii* 17XL infection of mice  
24 most closely reproduces the profile of gene expression changes seen in the major human  
25 severe malaria syndromes, accompanied by high parasite biomass, severe anemia,  
26 hyperlactatemia, and cerebral microvascular pathology. However, there is also considerable  
27 discordance of changes in gene expression between species and across all models, indicating  
28 that the relevance of biological mechanisms of interest in each model should be assessed  
29 before conducting experiments. Our data will aid selection of appropriate models for  
30 translational malaria research, and the approach is generalizable to other disease models.

31

## 32 **Introduction**

33 Animal models have played an important role in current understanding and treatment of  
34 many human diseases. Historically animal models were often selected because they  
35 reproduced certain clinical or pathological features of human disease (1), and their use has  
36 often been reinforced when treatments effective in the model were found to be effective in  
37 humans. However, this approach has limitations, because the same clinical or pathological  
38 features can occur as a result of different biological processes, and mechanisms which may  
39 be important in human disease might not be recapitulated or may be redundant in animal  
40 models, and vice-versa (2, 3). A fundamental and largely unresolved question is how best to  
41 define or quantify the relevance of any given animal model to the corresponding human  
42 disease (3, 4).

43 Mice are the most widely used model animals for many diseases, including infectious  
44 diseases, and for study of corresponding protective or pathogenic immune responses. Mouse

45 models have significantly broadened our understanding of the function and structure of  
46 mammalian immune systems and disease mechanisms. Despite evolutionary distance  
47 between human and mouse (5) and the high evolutionary pressure on immune systems (6),  
48 the principles of the immune systems for these species remain remarkably similar. However,  
49 there are also numerous differences between mice and humans in terms of their response to  
50 infection (5). Therefore, it is inevitable that mouse models of infection will not recapitulate  
51 all features of the human response, and this should be taken into account when using models  
52 to make inferences about mechanisms of human disease. Recently it has been proposed that  
53 unbiased approaches to assessment of the host response to infection, such as comparison of  
54 transcriptomic responses, might provide a meaningful way to quantify similarities between  
55 mouse models and human disease, to assess the relevance of the models, and to aid the  
56 selection of the best models for specific hypothesis testing (7).

57 The relevance of mouse models for translational research on the pathogenesis of severe  
58 malaria has been particularly controversial and has polarized the malaria research community  
59 (8). There are many different mouse malaria models, with very different characteristics  
60 dependent on the combination of parasite species (and strain) and mouse strain which are  
61 used (9). Superficially these models can, between them, reproduce almost all the clinical  
62 manifestations of human severe malaria (SM), such as coma, seizures, respiratory distress  
63 and severe anemia (10). Nevertheless, there are also notable differences to human disease,  
64 such as the lack of the pathognomonic cytoadhesive sequestration of large numbers of  
65 parasite infected red cells in the cerebral microvasculature in mice with cerebral malaria-like  
66 illness (11) (termed experimental cerebral malaria, ECM). Many host-directed treatments for  
67 SM have been effective in mice, but none have yet translated into benefit in human studies,  
68 which has been considered by some as further evidence that mouse models are of little  
69 relevance to human disease (12). We contend that this polarization of views is unhelpful, and

70 that mouse models are likely to be useful for understanding human malaria, so long as they  
71 are used selectively with full recognition of their limitations.

72 In order to provide a more quantitative framework to understand how well mouse malaria  
73 models recapitulate the biological processes occurring in human malaria, and to aid selection  
74 of the most appropriate models for study of specific mechanisms of disease, we present an  
75 unbiased investigation of the similarities and differences in the host response between human  
76 malaria and mouse models using comparative transcriptomics. We demonstrate that this  
77 approach allows us to identify mouse models with the greatest similarity of host response to  
78 specific human malaria phenotypes, and that models selected in this way do indeed have  
79 similar clinical and pathological features to those of the corresponding human phenotype. We  
80 propose that this approach should be applied more broadly to the selection of the most  
81 relevant animal models for study of malaria and other human diseases.

82

## 83 **Results**

### 84 **Mouse models of malaria**

85 The five rodent malaria parasite species used in this study produce different kinetics of  
86 parasitemia, different rates of progression of illness (Fig. 1), and different disease  
87 manifestations. 8-week-old C57BL/6 mice infected with *P. berghei* ANKA, *P. yoelii* 17XL  
88 and *P. berghei* NK65 developed severe illness with ascending parasitemia, consistent with  
89 previously reported outcomes of these lethal infections (12-15). Humane endpoints were  
90 reached at day 8-9 in *P. berghei* ANKA, day 5 in *P. yoelii* 17XL, and day 20 in *P. berghei*  
91 NK65. Mice infected with *P. berghei* ANKA showed typical features of ECM as assessed by  
92 Rapid Murine Coma and Behavior Scale (RMCBS) scores < 12 (13) and by histopathology.  
93 Mice infected with *P. yoelii* 17XL developed a rapidly progressive, severe infection with

94 hyperparasitemia (14). Mice infected with *P. berghei* NK65 developed a biphasic illness with  
95 a transient recovery of initial weight loss before progression to fatal outcome in a second  
96 phase (15).

97 8-week-old C57BL/6 mice infected with *P. yoelii* 17XNL and *P. chabaudi* AS, which lead to  
98 self-resolving infections, developed only mild symptoms as expected (16)(17). Maximum  
99 severity was reached around day 14 in *P. yoelii* 17XNL and day 13 in *P. chabaudi* AS.

100

### 101 **Figure 1: Course of infection in five mouse malaria models**

102 Comparison of parasitemia (a, b, c, d, e) and change in weight (as percentage of baseline  
103 weight) (f, g, h, i, j) for 8-week-old C57BL/6 female wild type mice infected with: *P. yoelii*  
104 *17XL*, *P. berghei* ANKA, *P. berghei* NK65, *P. yoelii* 17XNL, and *P. chabaudi* AS,  
105 *respectively*. Points show mean, and bars show SD, for n=6 mice (up to and including time  
106 point of first signs of ill health, dashed vertical line) and n=3 mice (after dashed vertical line)  
107 for each infection. † indicates humane endpoint for lethal infections.

108

### 109 **Comparative analysis of infection-associated changes gene expression**

110 To objectively assess how similar disease-associated systemic processes occurring in mouse  
111 malaria models are to those occurring in human *P. falciparum* malaria, we used a  
112 comparative transcriptomic approach focussed on blood. Rather than directly comparing  
113 expression of orthologous genes in humans and mice, which would be confounded by  
114 species-specific differences in constitutive gene expression, we first identified differentially  
115 expressed genes in pairwise within-species comparisons and then used these differentially  
116 expressed genes as the basis for between-species comparisons (Fig. 2a). This also enabled us

117 to conduct within-species adjustment for variation in leukocyte cell mixture, which is an  
118 important confounder in whole blood gene expression analysis (18). Additionally, this allows  
119 for the removal of platform-specific effects, which is especially relevant for comparisons  
120 between Microarray and RNA-Seq generated differentially expressed genes.

121 Sometimes we may wish to investigate the host immune response to infection *per se* or  
122 alternatively we may want to investigate the processes associated with severe disease  
123 pathogenesis, and these different aims require different comparator groups. In the former  
124 situation, changes in gene expression associated with infection *per se* are best characterised  
125 by comparison between healthy and infected states, whereas in the latter situation it may be  
126 more appropriate to compare severe and non-severe infection states.

127 To investigate concordance of the host response to uncomplicated malaria (UM) in humans  
128 and mice, we first focussed on comparisons between subjects with UM and healthy  
129 uninfected subjects. To assess changes in gene expression due to *P. falciparum* malaria we  
130 used two human transcriptomic datasets previously published by Idaghdour et al. (19) and  
131 Boldt et al. (20), each of which included a healthy uninfected group and an uncomplicated *P.*  
132 *falciparum* malaria group (Supplementary File 1). For the mice, we identified changes in  
133 gene expression occurring between mice culled at first onset of clinical signs of illness and  
134 healthy uninfected control mice. To remove the confounding effect of constitutive and  
135 infection-induced differences in leukocyte population proportions in blood, all differential  
136 expression analyses were performed with adjustment for the proportions of the major  
137 leukocyte populations in blood (see Methods; Supplementary File 2). Genes with absolute  
138 log-fold change in expression  $>1$  in the human healthy control vs UM comparison  
139 (Supplementary Files 3 and 4) and mouse orthologs (Supplementary File 5) were used for  
140 comparison between species.

141 First, considering only whether genes were up-regulated or down-regulated by infection in  
142 the mouse models, we found the mouse models varied from 58 to 73% concordance  
143 (Supplementary File 6, Fig. 2) with the up- or down-regulation in the human subjects in the  
144 study by Idaghdour et al.. However, we reasoned that the relative magnitude of changes in  
145 gene expression is also important to identify the mouse models which most closely  
146 recapitulate the changes in gene expression in human malaria. To assess this, we weighted  
147 genes to account for the relative magnitude of change in expression in human malaria, and  
148 then performed a principal component analysis with these weighted changes in expression  
149 (see Methods). This revealed variation between the mouse models, but no model was clearly  
150 much more representative of the changes in gene expression in human UM than any other  
151 (Fig. 2b). Indeed, when we focused only on the expression of the twenty most differentially  
152 expressed genes in human UM, we found that the mouse models showed broadly similar  
153 patterns of changes in gene expression (Fig. 2c). When we examined the concordance of up-  
154 and down-regulation of gene expression between the mouse models and human malaria in the  
155 Boldt et al. dataset, we found less overall similarity between species in the direction of  
156 changes in gene expression (Supplementary File 6). Despite this, and different genes driving  
157 the axes of variation, the PCA plots revealed a remarkably similar pattern to the analysis  
158 based on the Idaghdour et al. dataset, and none of the mouse models appeared to be clearly  
159 more representative of human UM than any other when accounting for the magnitude of  
160 changes in expression (Fig. 2d). Considering the most differentially expressed genes, there  
161 was more heterogeneity in the pattern of expression (Fig. 2e) which may be partly explained  
162 by the substantially smaller size, and analysis of pooled samples in the Boldt et al. study.

163 Gene ontology (GO) analysis was used to examine the genes driving the axes of variation  
164 between humans and mouse models in the PCA plot. For the Idaghdour et al. dataset we  
165 found that PC1 showed enrichment of leukocyte mediated immunity and adaptive immune

166 response, while PC2 showed enrichment for intrinsic apoptotic signalling in response to  
167 oxidative stress and regulation of T cell activation (Supplementary File 7). For the Boldt et al.  
168 dataset comparison, we found that that PC1 showed enrichment of cytokine-mediated  
169 signaling pathways and hemopoiesis as the top GO terms, while for PC2 the top GO terms  
170 included immune system process and myeloid cell development (Supplementary File 7).

171

172 **Figure 2. Comparison of host differential gene expression in human uncomplicated**  
173 **malaria and early-stage illness in five mouse malaria models.**

174 a) Schematic illustration of the comparative transcriptomic analysis. b, d) Principal  
175 component analysis (PCA) plots generated using rank-normalised log-fold change values  
176 from the human and mouse differential expression analyses. Only genes with 1:1 mouse and  
177 human orthologs and with absolute logFC value greater than 1 in the corresponding human  
178 comparison were included. Comparison of changes in gene expression in the mouse models  
179 (uninfected vs early in infection) with those in uncomplicated malaria vs healthy (PfUMH)  
180 Beninese children (b, Idaghdour et al. (19)) or Gabonese children (d, Boldt et al. (20)). The  
181 percentage of the total variation explained by principal components 1 and 2 are shown in the  
182 axis labels. Greyscale heatmaps parallel to each axis show the contributions of the 10 genes  
183 contributing most to the corresponding PC. c, e) Heatmaps show logFC for the 20 genes with  
184 the greatest absolute log fold change values in the human differential gene expression  
185 analysis, and their orthologs in each mouse model, corresponding to the analyses illustrated  
186 in b and d, respectively. Mouse models are ordered left to right in order of increasing  
187 dissimilarity to the human disease, based on the Euclidian distance calculated from all  
188 principal components (Supplementary File 8). The rows (genes) are ordered by absolute log  
189 fold change in the human comparison in descending order. n=3 for early and n=3 for late



190 time point in each mouse model; n=93 UM, n=61 controls (Beninese children, Idaghdour et  
191 al.), n=5 pools UM and n=5 pools healthy control samples (each pool contained RNA from 4  
192 Gabonese children with the same phenotype, Boldt et al.). The mouse model abbreviations  
193 are as follows: PbNK65 (*P. berghei* NK65), PbANKA (*P. berghei* ANKA), PcAS (*P.*  
194 *chabaudi* AS), Py17XL (*P. yoelii* 17XL) and Py17XNL (*P. yoelii* 17XNL).

195

### 196 **Comparative analysis of severe malaria-associated changes in gene expression**

197 A common approach to identify processes associated with the pathogenesis of severe  
198 infection is to compare individuals with severe manifestations against other individuals who  
199 have the same infection but have not developed severe illness (7). This approach is expected  
200 to enrich for genes involved in the pathogenesis of severe illness from amongst the larger set  
201 of genes involved in the overall response to infection (7). Therefore, we identified changes in  
202 gene expression in mice between the first time point at which mice developed signs of illness  
203 (early) and the maximum severity (late time point) of each of the 5 infection models. We  
204 compared these changes in gene expression in mice with those we had previously identified  
205 in Gambian children with UM and three different severe *P. falciparum* malaria (SM)  
206 phenotypes (hyperlactatemia (HL), cerebral malaria (CM), or the combined phenotype of  
207 hyperlactatemia with cerebral malaria (CH)) (18) (Fig. 3a). To remove the confounding effect  
208 of constitutive and infection-induced differences in leukocyte population proportions in  
209 blood, all differential expression analyses were performed with adjustment for the  
210 proportions of the major leukocyte populations in blood (see Methods; Supplementary File  
211 9).

212 Overall, the direction of changes in gene expression in the mouse models were less  
213 concordant with those in human SM phenotypes than we observed in the comparisons with

214 UM (Supplementary File 6, Fig. 3). There was, however, much clearer variation between the  
215 different mouse models in how closely the changes in expression of individual genes  
216 recapitulated those observed in each human SM manifestation (Fig. 3b, d, f). Using the  
217 principal component-based approach to compare weighted changes in gene expression in  
218 each infection, we were able to identify the models with greatest similarity to the  
219 transcriptional host response of each human SM phenotype (Fig. 3b, d, f and Supplementary  
220 File 6). It is notable that even amongst the twenty most differentially expressed genes  
221 associated with each human SM manifestation, there was considerable variation in the degree  
222 of concordance and discordance amongst the mouse models (Fig. 3c, e, g).

223 Hyperlactatemia is a relatively common manifestation of SM in children, and an independent  
224 predictor of death (21). Principal component analysis (PCA) revealed that *P. yoelii* 17XL and  
225 *P. berghei* NK65 models most closely recapitulated the changes in gene expression associated  
226 with this disease phenotype in Gambian children (Fig. 3b). We performed gene ontology  
227 enrichment analysis on the genes contributing most to the principal components explaining  
228 the greatest proportion of variation between the mouse models and human disease,  
229 identifying neutrophil degranulation driving PC1 and myeloid leukocyte activation driving  
230 PC2 (Supplementary File 7). Despite *P. yoelii* 17XL having the closest proximity to human  
231 malaria hyperlactatemia in the PCA plot, it was clear that even for this model many of the  
232 most differentially expressed genes were not concordantly regulated (Fig. 3c, Supplementary  
233 File 6). Amongst the most concordant genes were those encoding neutrophil granule proteins:  
234 Lactotransferrin (*LTF*, *Ltf*), Olfactomedin 4 (*OLFM4*, *Olfm4*), CD177 molecule (CD177,  
235 *Cd177*), Matrix Metalloproteinase 8 (MMP8, *Mmp8*), Lipocalin 2 (LCN2, *Lcn2*), Matrix  
236 Metalloproteinase 8 (MMP9, *Mmp9*), and S100 Calcium Binding Protein A8 (S100A8,  
237 *S100a8*); but there was notable discordance of expression of genes encoding Arginase 1

238 (*ARG1*, *Arg1*), Cathepsin G (*CTSG*, *CtsG*), Resistin (RETN, *Retn*), Vascular Cell Adhesion  
239 Molecule 1 (VCAM1, *Vcam1*), and Secreted Phosphoprotein 1 (SPP1, *Spp1*) (Fig. 3c).

240 In the comparison of the mouse models with the human CM phenotype (Fig. 3d), *P. yoelii*  
241 *17XL* was again the mouse model with greatest similarity in gene expression changes, and  
242 gene ontology analysis revealed that myeloid leucocyte activation and neutrophil  
243 degranulation were again the most enriched GO terms amongst the genes explaining the  
244 greatest variation between models (Supplementary File 7). The genes with concordant and  
245 discordant changes in expression between humans and mice were also similar to those in the  
246 HL comparison.

247 Findings were similar when we compared the changes in gene expression in the mouse  
248 models with those in children with UM versus children with the most severe phenotype  
249 where both CM and HL are present (CH) (18). *P. yoelii 17XL* was placed closest to human  
250 CH in the PCA plot (Fig. 3g), and the genes contributing most to PC1 and PC2 were again  
251 enriched in neutrophil degranulation and myeloid leukocyte activation GO terms  
252 (Supplementary File 7). Taken together the comparisons between mouse models and these  
253 three SM phenotypes in Gambian children suggest that *P. yoelii 17XL* recapitulates the  
254 profile of the most prominent changes in gene expression associated with human SM  
255 phenotypes more closely than the other mouse models.

256

257 **Figure 3: Comparison of host differential gene expression in three severe malaria**  
258 **phenotypes in Gambian Children and five mouse malaria models.**

259 a) Schematic illustration of the comparative transcriptomic analysis. b, d, f) Principal  
260 component analysis (PCA) plots generated using rank-normalised log fold change values  
261 from the human and mouse differential expression analyses. Only genes with 1:1 mouse and

262 human orthologs and with absolute logFC value greater than 1 in the corresponding human  
263 comparison were included. Comparison of changes in gene expression in the mouse models  
264 with those in human hyperlactatemia (PfHL) (b), cerebral malaria (PfCM) (d), or human  
265 hyperlactatemia plus cerebral malaria phenotype (PfCH) (f). The percentage of the total  
266 variation explained by principal components 1 and 2 are shown in the axis labels. Greyscale  
267 heatmaps parallel to each axis show the contributions of the 10 genes contributing most to the  
268 corresponding PC (c, e, g). Heatmaps show logFC for the 20 genes with the greatest absolute  
269 log fold change values in the human differential gene expression analysis, and their orthologs  
270 in each mouse model, corresponding to the analyses illustrated in b, d, and f, respectively.  
271 Mouse models are ordered left to right in order of increasing dissimilarity to the human  
272 disease, based on the Euclidian distance calculated from all principal components  
273 (Supplementary File 8). The rows (genes) are ordered by absolute log fold change in the  
274 human comparison in descending order. n=3 for early and n=3 for late time point in each  
275 mouse model; n= 21 Uncomplicated, n= 8 HL, n= 5 CM n= 12 CH. The mouse model  
276 abbreviations are as follows: PbNK65 (*P. berghei* NK65), PbANKA (*P. berghei* ANKA),  
277 PcAS (*P. chabaudi* AS), Py17XL (*P. yoelii* 17XL) and Py17XNL (*P. yoelii* 17XNL).

278

279 **Figure 4: Comparison of host differential gene expression in two severe malaria**  
280 **phenotypes in Gabonese Children and five mouse malaria models.**

281 a, c) Principal component analysis (PCA) plots generated using rank-normalised log fold  
282 change values from the human and mouse differential expression analyses. Only genes with  
283 1:1 mouse and human orthologs and with absolute logFC value greater than 1 in the  
284 corresponding human comparison were included. Comparison of changes in gene expression  
285 in the mouse models with those in human cerebral malaria (PfCM) (a) and severe anemia

286 (PfSA) (c). The percentage of the total variation explained by principal components 1 and 2  
287 are shown in the axis labels. Greyscale heatmaps parallel to each axis show the contributions  
288 of the 10 genes contributing most to the corresponding PC (b, d). Heatmaps show logFC for  
289 the 20 genes with the greatest absolute log fold change values in the human differential gene  
290 expression analysis, and their orthologs in each mouse model, corresponding to the analyses  
291 illustrated in a and c. Mouse models are ordered left to right in order of increasing  
292 dissimilarity to the human disease, based on the Euclidian distance calculated from all  
293 principal components (Supplementary File 8). The rows (genes) are ordered by absolute log  
294 fold change in the human comparison in descending order. n=3 for early and n=3 for late  
295 time point in each mouse model; n=5 pooled samples uncomplicated (UM), n=5 pooled  
296 samples CM, n=5 pooled samples SA (each pool contained RNA from 4 individuals with the  
297 same phenotype). The mouse model abbreviations are as follows: PbNK65 (*Plasmodium*  
298 *berghei* NK65), PbANKA (*Plasmodium berghei* ANKA), PcAS (*Plasmodium chabaudi* AS),  
299 Py17XL (*Plasmodium yoelii* 17XL) and Py17XNL (*Plasmodium yoelii* 17XNL).

300

301 The relative frequency of different manifestations of *P. falciparum* SM varies across different  
302 geographic locations, influenced by the intensity of exposure to malaria, naturally acquired  
303 immunity, and age of the individual (22, 23). Changes in gene expression associated with the  
304 same disease manifestation may also vary between studies in different populations, under  
305 genetic and environmental influences, and due to technical differences in the methods used to  
306 assess gene expression (24, 25). Therefore, we investigated whether similar results would be  
307 obtained using data from an independent study conducted in Gabonese children with *P.*  
308 *falciparum* infection (20).

309 In the study from which we obtained this data, Gabonese children with CM and CH  
310 (CM/CH) were not distinguished as separate phenotypes and were pooled into a single group  
311 for microarray analysis (see methods). Nevertheless, comparison of changes in gene  
312 expression between early and late stages of the mouse infections with those between  
313 Gabonese children with UM and CM/CH revealed that *P. yoelii* 17XL most closely  
314 recapitulated the differential expression seen in humans (Fig. 4, Supplementary Files 2 & 4).  
315 Gene ontology analysis confirmed that the innate immune response and leukocyte mediated  
316 immunity were the main drivers of variation between models, similar to the analysis in  
317 Gambian children (Supplementary File 7).

318 In contrast to the Gambian dataset, where severe anemia (SA) was rare (26), the SA  
319 phenotype was included in the Gabonese dataset. Comparing the differential gene expression  
320 in the mouse models and those between UM and SA also identified that the changes in gene  
321 expression seen in *P. yoelii* 17XL were most similar to the differences seen in the Gabonese  
322 children (Fig. 4c). The genes with highly concordant expression between SA and *P. yoelii*  
323 17XL were prominently neutrophil related (*LTF*, *OLFM4*, *MMP9* and *IL1R2*) (Fig. 4d), gene  
324 ontology analysis revealed that the main drivers of PC1 were slightly different to previous  
325 comparisons with prominence of immune response and type I interferon signalling pathways,  
326 whilst PC2 drivers were more similar to previous comparisons including leukocyte activation  
327 and neutrophil degranulation (Supplementary File 7). These data from Gabonese children  
328 provide independent, cross-platform, comparison, and substantiate that the profile of gene  
329 expression associated with severe *P. yoelii* 17XL infection is most similar to those in the  
330 major human SM phenotypes.

331

332 **Comparative transcriptomic results are consistent with pathophysiology**

333 The profile of changes in gene expression associated with HL, CM, and SA, the three most  
334 common manifestations of SM in children, were all better recapitulated by the changes in  
335 gene expression in *P. yoelii* 17XL than any other mouse model. However, this model is not  
336 widely used to study the pathogenesis of these specific SM syndromes, so we sought to  
337 determine whether *P. yoelii* 17XL does reproduce the pathophysiological features of these  
338 infections. Blood lactate levels have rarely been reported in mouse malaria models, so we  
339 systematically measured lactate concentrations at early and late stages of infection in all five  
340 mouse models (Fig. 5a, Supplementary File 10). Small differences, if any, were noticed at the  
341 uncomplicated stage early in infection, while at maximum severity *P. yoelii* 17XL and *P.*  
342 *berghei* NK65 infected mice developed dramatic hyperlactatemia with concentrations similar  
343 to the maximum values seen in human HL (18).

344 *P. yoelii* 17XL also reproduced the changes in gene expression associated with human SA  
345 better than other mouse models. Human SA is often associated with very high parasite  
346 biomass (26) and *P. yoelii* 17XL achieves much higher parasite load than other mouse  
347 models (Fig. 1) as well as causing rapid and profound anemia (27, 28) (Fig. 5b).

348 *P. yoelii* 17XL also showed the greatest transcriptional similarity to the pattern of changes in  
349 whole blood gene expression associated with human CM. *P. yoelii* 17XL was originally  
350 described as a virulent clone causing CM-like pathology (29), but it has subsequently been  
351 replaced by *P. berghei* ANKA as the most commonly used model of experimental CM. Since  
352 one of the key pathological mechanisms leading to death in paediatric CM is brain swelling  
353 due to extravascular fluid leak (30) we examined the presence of extravascular fibrinogen  
354 (31) as an indicator of vascular leak in the brains of both *P. berghei* ANKA and *P. yoelii* 17XL  
355 infected mice compared to uninfected (Fig. 5c). We found that brains from both infections  
356 had areas which stained positively for perivascular fibrinogen (indicative of vascular leak),  
357 while additionally some of the vessels from *P. yoelii* 17XL infected mice showed strong

358 intravascular staining, suggestive of microthrombus formation (Fig. 5c iv), another  
359 mechanism that has been implicated in human CM (30, 31).

360

361 **Figure 5. Pathophysiological features of rodent malaria infections.** a) Lactate  
362 concentration in blood (mmol/L) in mice, uninfected, or at the early or late stage of each  
363 malaria parasite infection (n=3 for each infection time point). Error bars show median with  
364 range, One-way ANOVA  $P$ -value < 0.0001,  $P$ -values for post-hoc Dunnett's multiple  
365 comparisons against uninfected mice are shown within the plot. b) Erythrocyte counts from  
366 *P. yoelii* 17XL infected mice, n=9, representative of 3 experiments, repeated measures  
367 ANOVA  $P$ -value < 0.01. c) Representative histological specimens of brain with fibrinogen  
368 staining to identify vascular leak in mice uninfected (i, ii), infected with *P. yoelii* 17XL (iii,  
369 iv), and infected *P. berghei* ANKA (v, vi) collected at the late stage (humane endpoint) of  
370 infection. Arrowheads identify extravascular fibrinogen indicating leak from the vasculature.  
371 Arrow points to strong intravascular fibrinogen staining (iv) suggestive of microthrombus.  
372 Representative images from analysis of uninfected mouse brains n=3; *P. yoelii* 17XL-  
373 infected mouse brains n=5; *P. berghei* ANKA-infected mouse brains n=4; Scale bar: 50  $\mu$ m.  
374 8-week-old wild-type female C57BL/6 mice were used in all experiments.

375

## 376 **Discussion**

377 Mice are the most cost effective and widely used model organism for studying many human  
378 diseases (32, 33). Nevertheless, mice are distant evolutionarily and differ substantially from  
379 humans in many ways (5, 34). Disease models in mice often involve artificial induction of  
380 disease, which may reduce complexity and aid reproducibility, but might also limit their  
381 translational relevance. Therapeutic interventions that work in mice often fail when used in



382 human clinical trials (35, 36). As a result, the usefulness of mice in some areas of  
383 translational research is debated (37, 38). Recently, concerted efforts have been made to  
384 improve both scientific and ethical aspects of the use of animals in biomedical research, with  
385 emphasis on the principles of replacement, reduction and refinement (the “3Rs”), and  
386 improving reproducibility through better experimental design and standardised reporting  
387 guidelines (39). Despite this, there has been little parallel effort made to assess or improve  
388 the relevance of animal models in translational research, and approaches which would  
389 improve translation from mice to humans are needed (40).

390 In malaria research mouse models are widely used but their relevance to human disease is  
391 contentious (8). Here, we objectively assessed the biological processes occurring in blood in  
392 some of the most commonly used mouse models of malaria to examine their similarity to  
393 human malaria, using a comparative transcriptomic approach. The five rodent malaria  
394 parasites we used led to the development of distinct disease trajectories and clinical features.  
395 Whilst no rodent malaria parasites induced changes in gene expression which fully  
396 recapitulated those in human malaria, at an early stage of infection, the rodent malaria  
397 parasites induced relatively similar transcriptional host responses to each other, with at least a  
398 broad overall similarity to that seen in a large study of UM in African children. However,  
399 when we investigated the similarity of the changes in gene expression associated with  
400 different SM manifestations, we saw that there was more heterogeneity, and the concordance  
401 and discordance of expression of individual genes varied more between each mouse model  
402 and each phenotype. One of the greatest sources of variation between the mouse models was  
403 in the myeloid cell response, particularly neutrophil response, associated with severe malaria  
404 manifestations.

405 An important implication of our findings is that the selection of the most appropriate mouse  
406 model for investigation of a particular mechanism of interest should not be made solely on

407 the similarity of clinical phenotype in humans and mice. We propose that it should also be  
408 based on the degree of concordance of expression of genes associated with the mechanism of  
409 interest. Failure to consider the similarities and differences in biological processes indicated  
410 by gene expression could lead to experiments targeting pathways which are not involved in  
411 the host response to a particular mouse malaria parasite, making the experiments futile,  
412 unethical, and potentially leading to erroneous conclusions.

413 We identified that the pattern of changes in gene expression between early and late stages of  
414 *P. yoelii* 17XL infected mice showed the greatest similarity to the differences in gene  
415 expression between human UM and each of HL, CM, CH, and SA, suggesting that this model  
416 might be most representative of the profile of changes in host response induced by human  
417 severe malaria. This mouse model not only develops a very high parasite load, but our data  
418 suggest lethality at 5-7 days post infection is part of a multisystem disorder, accompanied by  
419 extreme hyperlactatemia at levels similar to those seen in human HL and CH. Until now, the  
420 lack of a rodent model to study malaria-induced hyperlactatemia has held back understanding  
421 of the mechanisms causing such high levels of lactate and how these relate to the increased  
422 risk of death in patients with malaria. *P. yoelii* 17XL infection of C57BL/6 mice is an  
423 attractive model for further translational research on this SM phenotype.

424 In the brains of *P. yoelii* 17XL infected mice we identified extravascular fibrinogen leak. This  
425 suggests that these mice may be in the process of developing a neurological syndrome at the  
426 time they reach the humane endpoint and may explain why this model showed transcriptional  
427 similarity to human CM. The transcriptional similarity of Py17XL to the human SA  
428 phenotype is consistent with the severe anemia and high parasite load which occurs in this  
429 infection.

430 Our study provides important insights into the translational relevance of commonly used  
431 mouse models of malaria, and more generally highlights the importance of considering  
432 relevance in addition to the 3Rs and reproducibility when planning any animal experiments.  
433 Our data is provided as a resource for researchers to help them to determine the concordance  
434 of gene expression between mouse malaria models and human disease, and we have  
435 identified an attractive mouse model for further translational studies on malarial  
436 hyperlactatemia. A strength of analysing the blood transcriptome is that it represents the  
437 systemic host response to infection, capturing both the direct influence of an infectious agent  
438 on blood leukocytes, and the response of blood leukocytes to mediators released into the  
439 circulation by cells in other organs. However, the blood transcriptome cannot assess the  
440 concordance of processes occurring within specific organs which do not produce changes in  
441 gene expression of circulating leukocytes, and our data should not be used to prevent testing  
442 of reasonable hypotheses about such tissue-specific interactions. Reassuringly, our findings  
443 were broadly consistent when we performed comparisons with human subjects from  
444 independent studies in different populations and using different transcriptomic methods.  
445 Stronger and more generalizable conclusions, and more nuanced approaches to analysis may  
446 be possible if future studies add to the data we have collected, with larger numbers of mice  
447 and greater sequencing depth. Future work should also assess other commonly-used mouse  
448 malaria models, using additional common mouse strains (including Balb/c and DBA/2), both  
449 sexes, and additional parasite strains.

450

451 **Methods**

452 **Experimental design**

453 We compared the whole blood transcriptome changes associated with severe malaria in mice  
454 and humans to identify concordant and discordant patterns of gene expression, and to identify  
455 which mouse models show the most similar changes to those seen in humans.

456 We chose to compare the changes in gene expression between human UM and SM categories  
457 with those seen between early and late mouse infections, assuming that mice harvested early  
458 in infection (when the first symptoms occur) represent uncomplicated malaria while mice at  
459 the peak of severity symptoms (or humane endpoints) represent severe malaria. Human data  
460 was obtained from published datasets from our group (18) and others (19, 20) while mouse  
461 data was generated specifically for this experiment.

462

463 **Animals and procedures**

464 8-week-old wild-type female C57BL/6 mice were obtained from Charles River Laboratories.  
465 All mice were specified pathogen free, housed in groups of five in individually ventilated  
466 cages, and allowed free access to food and water. All protocols and procedures were  
467 approved by Imperial College Animal Welfare and Ethical Review Board, following  
468 Laboratory Animal Science Association good practice guidance. Mice were acclimatized to  
469 the animal facility for one week before any experimental procedures. Parasites kept in  
470 Alsever's solution with 10% glycerol (mixed at 1:2 ratio) in liquid nitrogen were defrosted  
471 and accordingly diluted (depending on parasitemia of the frozen stock) to infect a passage  
472 mouse. The passage mouse infection was then closely monitored until healthy parasites were  
473 observed in a blood smear and parasitemia reached at least 2%. Sterile blood was collected,

474 before parasitemia reached 5%, by cardiac puncture under non-recovery isoflurane  
475 anesthesia, and diluted in sterile PBS to achieve desired concentration. Viable parasites of  
476 strains *P. berghei* ANKA (lethal), *P. berghei* NK65 (lethal), *P. yoelii* 17XL (lethal), *P. yoelii*  
477 17XNL (non-lethal), and *P. chabaudi* AS (non-lethal) were prepared from frozen stocks by  
478 blood passage. Experimental mice were infected with  $10^5$  live parasites by intraperitoneal  
479 injection. 50 mice were randomly allocated to be infected in groups of 10 with each parasite  
480 strain and then segregated into two cages of five mice each per parasite strain. 10 control  
481 uninfected mice were used for weight-gain comparisons.

482 The weight and physical condition of each mouse was monitored throughout the course of  
483 each infection (Supplementary File 11). Change in weight was calculated as a percentage of  
484 baseline weight measured prior to infection. For *P. berghei* ANKA infection, which causes  
485 experimental cerebral malaria, additional neurological monitoring was performed using the  
486 Rapid Murine Coma and Behaviour Scale (RMCBS) (13), which includes assessment of gait,  
487 motor performance, balance, limb strength, body position, touch escape, pina reflex, foot  
488 withdrawal reflex, aggression, and grooming. Due to the need for different intensity and  
489 nature of monitoring in each infection to ensure animal welfare, blinding to infection group  
490 was considered inappropriate.

491 The early time point was defined as the first time at which mice manifested any signs of ill  
492 health, including any reduction in activity, ruffled fur or weight loss. The late time point was  
493 defined as the humane endpoint for each lethal parasite species (Supplementary File 11), or a  
494 time point chosen to be just before the expected day of maximum severity of non-lethal  
495 infections (to avoid sampling mice which were starting to recover).

496 Tail capillary blood was used to prepare blood smears for analysis of parasitemia and lactate  
497 measurement using the Lactate Pro 2 (HAB direct) lactate meter. Parasitemia was quantified

498 by microscopy of thin blood smears stained with 10% Giemsa and examined at 100x  
499 magnification with a Miller Square reticle. Erythrocyte counts were determined using a Z2  
500 Coulter particle counter (Beckman Coulter). When mice were euthanized, heparinized blood  
501 was collected by cardiac puncture under non-recovery isoflurane anesthesia, and an aliquot of  
502 300-500uL was immediately mixed at 1:2.76 volume ratio with fluid from a Paxgene blood  
503 RNA tube (Qiagen), whilst the remainder was stored on ice for flow cytometry analysis.  
504 Brains were collected from *P. yoelii* 17XL and *P. berghei* ANKA infected mice and fixed in  
505 4% paraformaldehyde for 48 hours before being processed. Brains were then paraffin  
506 embedded, cut, and stained with antibody against fibrinogen (ab34269 1:100, Abcam, UK)  
507 using a Roche automated staining system. Digitized images taken at x 40 magnification  
508 (LEICA SCN400, Leica microsystems U.K) at IQPath (Institute of Neurology, University  
509 College, London, UK). Images were then viewed and examined with Aperio ImageScope  
510 software (Leica Biosystems Imaging, Inc.).

511

## 512 **Flow cytometry**

513 The proportions of major leukocyte subpopulations in mouse blood were determined by flow  
514 cytometry using specific cell-surface marker antibodies. Approximately 50 µl of whole blood  
515 was mixed with 2 ml ammonium chloride red-cell lysis buffer for 5 minutes at room  
516 temperature, then samples were centrifuged and washed in flow cytometry buffer (specify  
517 this) and centrifuged again. Resultant cell pellets were resuspended in 50ul of antibody  
518 cocktail (all antibodies from Biolegend, Supplementary File 12) for 30 minutes before further  
519 washing and fixation in 2% paraformaldehyde. Flow cytometry was performed using a BD  
520 LSR Fortessa machine. BD FACSDiva software was used to collect the data and analysis was  
521 conducted using FlowJo v10 (TreeStar Inc.), gating on single leukocytes before identification  
522 of major cell populations according to their surface marker staining (Supplementary Figure 1

523 in Supplementary File 1). Leucocyte proportions for early and late timepoint within each  
524 infection are presented in Supplementary Figure 2 in Supplementary File 1.

525

#### 526 **RNA isolation from mouse blood**

527 RNA extraction was performed using the PAXgene Blood RNA Kit (Qiagen) according to  
528 the manufacturers' instructions (41). After the isolation of the RNA, Nanodrop ND-1000  
529 Spectrophotometer (Labtech) was used to obtain the ratio of absorbance at 260 nm and 280  
530 nm (260/280) which is used to assess the purity of RNA (or DNA). Values of ~2 are  
531 generally accepted as pure for RNA. RNA integrity was assessed using Agilent RNA 6000  
532 Nano Kit (Agilent), used according to the manufacturers' instructions with the Agilent 2100  
533 Bioanalyzer (Agilent), and all traces were inspected visually for evidence of RNA  
534 degradation because the RNA Integrity Number calculation can be misleading when host and  
535 parasite RNA are both present in significant quantities (18).

536 For the RNA sequencing analysis 6 samples were selected from each infection (3 from the  
537 early time point and 3 from the late time point), along with 3 uninfected control. Samples  
538 were selected based on the RNA quality (260/280 ratio and Agilent 2100 Bioanalyzer traces).  
539 If more than 3 samples for each infection and time point were of sufficient quality, we  
540 selected the three with most similar clinical score and parasitemia levels within each group.

541

#### 542 **Dual-RNA sequencing**

543 Library preparation and sequencing to generate the mouse RNA-Seq data was performed at  
544 the Exeter University sequencing service. Libraries were prepared from 1µg of total RNA  
545 with the use of ScriptSeq v2 RNA-Seq library preparation kit (Illumina) and the Globin-Zero

546 Gold kit (Epicentre) to remove globin mRNA and ribosomal RNA. Prepared strand-specific  
547 libraries were sequenced using the 2x125bp protocol on an Illumina HiSeq 2500 instrument.

548

#### 549 **Gene annotations**

550 Human reference genome (hg38) was obtained from UCSC genome browser  
551 (<http://genome.ucsc.edu/>), mouse reference genome (mm10) was obtained from UCSC  
552 genome browser (<http://genome.ucsc.edu/>). Human gene annotation was obtained from  
553 GENCODE (release 22) (<http://genencodegenes.org/releases/>), mouse gene annotation was  
554 obtained from GENCODE (release M16) (<http://genencodegenes.org/releases/>). The  
555 *Plasmodium* (*P. berghei*, *P. chabaudi* and *P. yoelii*) genomes were obtained from PlasmoDB  
556 (release 24) (42).

557

#### 558 **Mouse RNA-Seq Quality Control, Mapping and Quantification**

559 Quality control was carried out using fastqc (43) and fastqscreen (44). Adapters were  
560 trimmed using cutadapt (45). The read 1 (R1, -a) adapter is  
561 AGATCGGAAGAGCACACGTCT, and the read 2 (R2, -A) adapter is  
562 AGATCGGAAGAGCGTCGTGTAGGGAAAGAGTGT.

563 The trimmed reads were then mapped to the combined genomic index containing both mouse  
564 and the appropriate *Plasmodium* genome using the splice-aware STAR aligner (46). Reads  
565 were extracted from the output BAM file to separate parasite-mapped reads from mouse-  
566 mapped reads. Reads mapping to both genomes were counted for each sample and removed.  
567 BAM files were sorted, read groups replaced with a single new read group and all reads



568 assigned to it. HTSeq-count (47) was used to count the reads mapped to exons with the  
569 parameter “-m union”. Only uniquely mapping reads were counted.

570

### 571 **Mouse Differential gene expression analysis**

572 The raw expression counts can be found in Supplementary File 13. Firstly, the ensembl gene  
573 ID versions were matched to their MGI gene symbols and entrez IDs using biomaRt  
574 (annotation used: <http://jul2018.archive.ensembl.org>, mmusculus\_gene\_ensembl) (48, 49).  
575 Genes for which this information was not available were excluded from the analysis. Of  
576 these, only genes with raw expression values of greater than 5 in at least 3 samples were  
577 taken forward.

578 The differential gene expression analysis was then performed using the R package edgeR,  
579 raw read counts of each data set were normalised using a trimmed mean of M-values (TMM),  
580 which considers the library size and the RNA composition of the input data.

581 In order to account for variation between samples in the proportions of the major blood  
582 leukocyte populations (neutrophil, monocyte, CD4 T cell, CD8 T cell) we used their  
583 proportions estimated by flow cytometry (Supplementary File 14) as covariates in edgeR,  
584 adjusting for their effect on whole blood gene expression. B cells were excluded from the  
585 design matrix of the differential expression analysis due to the proportions totalling 100%.  
586 Thus, the design matrix (with the intercept set to 0) consisted of each sample’s disease type  
587 (the mouse model plus if the sample was early or late in infection i.e. *P. yoelii* 17XL\_late)  
588 with the cell type proportions as covariates. Results of the differential expression analyses are  
589 presented in Supplementary File 2. Metadata matches each sample to their phenotype can be  
590 found in Supplementary File 15.

591

592 **Analysis of the Human RNA-Seq dataset.**

593 For the comparison with RNA-Seq data from human hosts, data from our previously  
594 published Gambian children cohort (Supplementary File 1) were used (18). This dataset can  
595 be found in the ArrayExpress database ([www.ebi.ac.uk/arrayexpress](http://www.ebi.ac.uk/arrayexpress)) using the accession  
596 number E-MTAB-6413 and metadata are also presented in Supplementary File 16. The  
597 differential expression results were extracted from this study. These had already been  
598 adjusted for variation in leukocyte proportions and were used without further processing.  
599 Lists of differentially expressed genes in Supplementary File 9.

600

601 **Analysis of Human Microarray Datasets**

602 Expression values for two human microarray datasets were extracted from the GEO database  
603 (20, 50). For the Boldt et al. study, background correction, normalisation, and batch  
604 correction was performed on the raw expression values using the methods given in  
605 Supplementary File 1. For the Idaghdour et al. study the data was downloaded as pre-  
606 normalised expression values.

607 CellCODE (51) was used to estimate the proportions of the major blood leukocyte  
608 subpopulations (neutrophils, monocytes, CD4 T cells, CD8 T cells and B cells) in each of the  
609 samples, based on reference gene expression profiles (Allantaz et al. GEO Accession:  
610 GSE28490 (52); the full signature dataset derived from Allantaz et al., not just those used for  
611 these datasets, can be found in Supplementary File 17). Surrogate proportion variables for  
612 each leukocyte subpopulation were then used as covariates in differential gene expression  
613 pairwise analysis in Limma (53) (Supplementary File 1).

614 The One sample (GSM848487) was removed from the Idaghdour et al. dataset because the  
615 age of the subject was not available. The original study sampled a population with wide age  
616 range from different locations, so following the approach in the original study, differential  
617 expression analysis included age, location (Zinvie or Cotonou), and hemoglobin genotype  
618 (AA, AS or AC) in addition to the leukocyte subpopulation surrogate proportion variables as  
619 covariates for the pairwise differential expression analysis conducted using Limma.

620 The lists of differentially expressed genes for these datasets are available in Supplementary  
621 Files 3 and 4.

622

### 623 **Identification of Orthologous Genes**

624 A text file of all the orthologous (Ensembl 52) *Homo sapiens* (NCBI36) and *Mus Musculus*  
625 genes was extracted from the Ensembl database and used as a reference (Supplementary File  
626 5).

627

### 628 **Comparative Transcriptomics using Principal Component Analysis**

629 To use as much information as possible about changes in gene expression between conditions  
630 in human and mouse malaria datasets of varying size, we did not impose a p-value threshold  
631 but began by selecting all genes in the human differential expression analyses with absolute  
632 log-fold change greater than 1. We then selected those with 1:1 orthologs in mice, and used  
633 these genes for subsequent comparisons with gene expression in mice. There were no cut-offs  
634 applied based on the differences in expression between early and late stage infection in mice.  
635 Therefore, our analyses assess the extent to which changes in mouse gene expression

636 recapitulate those in humans, but do not address the reciprocal question of how well human  
637 gene expression recapitulates that in mice.

638 To compare patterns of gene expression associated with pathogenesis between species,  
639 without undue influence of species-specific variation in the baseline- or inducible- expression  
640 of each gene, we focused further analysis on the contrasts between comparable pairs of  
641 human and pairs of mouse infection states. Both human microarray UM vs healthy results  
642 were compared to the mouse early stage infection vs uninfected control results.

643 The human RNA-Seq (Lee et al. 2018) CM vs UM, HL vs UM, CH vs UM, and microarray  
644 (Boldt et al. data) CM vs UM and SA vs UM results were compared to mouse late stage vs  
645 early stage of infection results for each mouse model.

646 To allow comparison of the relative magnitudes of changes in gene expression between the  
647 human and mouse models, we developed a rank-based analysis of the changes in expression  
648 in each human and mouse pairwise comparison. Genes were ranked in descending order of  
649 absolute log fold change, with ties given the same minimum rank. Each gene was then  
650 assigned a value of 100 divided by rank, which was then multiplied by the sign of the original  
651 log fold change. For example, if the original log fold change was negative the rank-  
652 standardised value would then be multiplied by -1. This approach means that the genes with  
653 greatest difference in expression between the conditions of interest within-species have the  
654 biggest effect on the comparative transcriptomic analysis between species. These values are  
655 presented in Supplementary File 18 and were used as the input for subsequent Principal  
656 Component Analysis (PCA) to highlight the differences and similarities between the mouse  
657 models and human disease comparisons in low-dimensional space. The PCAs were  
658 performed using the R-core function `Prcomp()` with default parameters and visualised using  
659 functions from the `ggbiplot` (54) and `ggimage` packages. The 10 genes that contributed the

660 most to principal components 1 and 2 (a subset of those given in Supplementary File 19)  
661 were collected using the factoextra (55) and FactoMineR (56) packages, specifically the  
662 PCA() function, with scale.unit set to FALSE to correspond to the default parameters of the  
663 Prcomp() function.

664

### 665 **Gene Ontology Analysis**

666 Lists of genes contributing greater than or equal to 0.1% to PC1 and/or PC2 were also  
667 extracted (Supplementary File 19). These were used as the genes of interest for Gene  
668 Ontology (GO) term enrichment analysis performed using the goana.DGELRT() function  
669 (Package: Limma) (53). The list of all the 1:1 orthologs used as the input for the Principal  
670 Component Analysis were used as the background gene lists (Supplementary File 20).  
671 Human gene IDs were fed to the GO term enrichment analysis. For each comparison in each  
672 dataset the Euclidean distances (Supplementary File 8) between each of the mouse models  
673 and the human data were calculated using standardised log fold change values and the R-core  
674 dist() function.

675

### 676 **Heatmaps**

677 The 20 genes with the greatest absolute log fold change value in the each human disease  
678 comparison were used to construct illustrative heatmaps using the heatmap.2() function from  
679 the R package gplots (57).

680

### 681 **Statistical Tests**

682 GraphPad Prism 8 (GraphPad Software) was used for statistical analyses of lactate  
683 concentration in the different mouse models and erythrocyte counts from *P. yoelii* 17XL  
684 infected mice. One-way ANOVA test was used to compare the lactate concentration in mice  
685 uninfected or infected at different time points and post-hoc Dunnett's test for multiple  
686 comparisons. One-way ANOVA for repeated measures was used to analyse erythrocyte  
687 counts from *P. yoelii* 17XL infected mice. All tests were two-sided using a significance  
688 threshold of 5%.

689

690 **Acknowledgements.** This work was supported by the UK MRC and the UK Department for  
691 International Development (DFID) under the MRC/DFID Concordat agreement and is also  
692 part of the EDCTP2 program supported by the European Union (MR/L006529/1 to A.J.C.),  
693 Imperial College Dean's EPSRC Studentship (to C.D.), Imperial College-Wellcome Trust  
694 Institutional Strategic Support Fund (to A.G.), Sir Henry Wellcome Fellowship  
695 (206508/Z/17/Z to M.K), and the analysis of patient data was supported by the NIHR  
696 Imperial Biomedical Research Centre. Exeter Sequencing Service is supported by an MRC  
697 Clinical Infrastructure award (MR/M008924/1), the Wellcome Trust Institutional Strategic  
698 Support Fund (WT097835MF), a Wellcome Trust Multi-User Equipment Award  
699 (WT101650MA), and a Biotechnology and Biological Sciences Research Council Longer  
700 and Larger award (BB/K003240/1).

701 **Author contributions.** A.G. and A.J.C. contributed to conceptualization; A.G. performed  
702 experimental work; A.G., C.D., P.S.B., and H.J.L. analyzed the data; A.G., C.D., A.J.C. and  
703 M.K. drafted the manuscript; A.J.C. supervised all aspects of the work; all authors  
704 contributed to critical revision and approved the final manuscript.

705 **Competing interests.** The authors declare that they have no competing interests.

706 **Materials & Correspondence.** Correspondence and requests for access to data and materials  
707 should be addressed to Dr Aubrey J. Cunnington, [a.cunnington@imperial.ac.uk](mailto:a.cunnington@imperial.ac.uk).

708

#### 709 **Data Availability**

710 The adapter trimmed RNA-Sequencing files for the mouse RNA-Seq data have been  
711 submitted to the European Nucleotide Archive (ENA) and are available under the study  
712 accession number PRJEB43641.

713

#### 714 **Supplementary Materials**

715 Supplementary File 1 Supplementary Figures and small tables

716 Contains:

717 Supplementary Table.1 Details of the publicly available human datasets

718 Supplementary Figure 1: Gating strategy for defining WBC proportions in mouse blood

719 Supplementary Figure 2: Leucocyte proportions measured in whole blood by flow cytometry.

720 Supplementary File 2 Mouse Differential Expression Analysis

721 Supplementary File 3 Idaghdour et al 2012 Differential Expression Analysis

722 Supplementary File 4 Boldt et al 2019 Differential Expression Analysis

723 Supplementary File 5 Human Mouse Orthologs

724 Supplementary File 6 Discordance-Concordance Table

725 Supplementary File 7 Gene ontology enrichment analysis

726 Supplementary File 8 Euclidean Distances

727 Supplementary File 9 Lee et al 2018 Differential Expression Analysis

728 Supplementary File 10 Mouse Lactate Measurements

729 Supplementary File 11 Severity scoring

730 Supplementary File 12 Antibodies used for FACS

731 Supplementary File 13 Mouse RNA-Seq Raw Counts

- 732 Supplementary File 14 Mouse Cell Type Proportions  
733 Supplementary File 15 Metadata for Mouse RNA-Seq Files  
734 Supplementary File 16 Lee et al. 2018 Sample Metadata  
735 Supplementary File 17 Reference Immune Cell Type Expression Profiles for Deconvolution  
736 Supplementary File 18 PCA input standardised logFC values  
737 Supplementary File 19 Genes contributing to Principal Component Analyses  
738 Supplementary File 20 GO Term Background Gene Lists

739

## 740 **References**

- 741 1. Hau J. *Animal Models for Human Diseases*: Humana Press.; 2008.
- 742 2. Pound P, Ritskes-Hoitinga M. Is it possible to overcome issues of external validity in  
743 preclinical animal research? Why most animal models are bound to fail. *J Transl Med.*  
744 2018;16(1):304.
- 745 3. Justice MJ, Dhillon P. Using the mouse to model human disease: increasing validity and  
746 reproducibility. *Dis Model Mech.* 2016;9(2):101-3.
- 747 4. Ferreira GS, Veening-Griffioen DH, Boon WPC, Moors EHM, Gispens-de Wied CC,  
748 Schellekens H, et al. A standardised framework to identify optimal animal models for efficacy  
749 assessment in drug development. *PLoS One.* 2019;14(6):e0218014.
- 750 5. Mestas J, Hughes CC. Of mice and not men: differences between mouse and human  
751 immunology. *J Immunol.* 2004;172(5):2731-8.
- 752 6. Cagliani R, Sironi M. Pathogen-driven selection in the human genome. *Int J Evol Biol.*  
753 2013;2013:204240.
- 754 7. Lee HJ, Georgiadou A, Otto TD, Levin M, Coin LJ, Conway DJ, et al. Transcriptomic  
755 Studies of Malaria: a Paradigm for Investigation of Systemic Host-Pathogen Interactions. *Microbiol*  
756 *Mol Biol Rev.* 2018;82(2).
- 757 8. Craig AG, Grau GE, Janse C, Kazura JW, Milner D, Barnwell JW, et al. The role of animal  
758 models for research on severe malaria. *Plos Pathog.* 2012;8(2):e1002401.



- 759 9. Lamb TJ, Brown DE, Potocnik AJ, Langhorne J. Insights into the immunopathogenesis of  
760 malaria using mouse models. *Expert Rev Mol Med*. 2006;8(6):1-22.
- 761 10. Zuzarte-Luis V, Mota MM, Vigario AM. Malaria infections: what and how can mice teach us.  
762 *J Immunol Methods*. 2014;410:113-22.
- 763 11. Ghazanfari N, Mueller SN, Heath WR. Cerebral Malaria in Mouse and Man. *Front Immunol*.  
764 2018;9:2016.
- 765 12. White NJ, Turner GD, Medana IM, Dondorp AM, Day NP. The murine cerebral malaria  
766 phenomenon. *Trends Parasitol*. 2010;26(1):11-5.
- 767 13. Carroll RW, Wainwright MS, Kim KY, Kidambi T, Gomez ND, Taylor T, et al. A rapid  
768 murine coma and behavior scale for quantitative assessment of murine cerebral malaria. *PLoS One*.  
769 2010;5(10).
- 770 14. Walliker D, Sanderson A, Yoeli M, Hargreaves BJ. A genetic investigation of virulence in a  
771 rodent malaria parasite. *Parasitology*. 1976;72(2):183-94.
- 772 15. Vandermosten L, Pham TT, Possemiers H, Knoops S, Van Herck E, Deckers J, et al.  
773 Experimental malaria-associated acute respiratory distress syndrome is dependent on the parasite-host  
774 combination and coincides with normocyte invasion. *Malar J*. 2018;17(1):102.
- 775 16. Wijayalath W, Danner R, Kleschenko Y, Majji S, Villasante EF, Richie TL, et al. HLA class  
776 II (DR0401) molecules induce Foxp3+ regulatory T cell suppression of B cells in *Plasmodium yoelii*  
777 strain 17XNL malaria. *Infect Immun*. 2014;82(1):286-97.
- 778 17. Achtman AH, Khan M, MacLennan IC, Langhorne J. *Plasmodium chabaudi chabaudi*  
779 infection in mice induces strong B cell responses and striking but temporary changes in splenic cell  
780 distribution. *J Immunol*. 2003;171(1):317-24.
- 781 18. Lee HJ, Georgiadou A, Walther M, Nwakanma D, Stewart LB, Levin M, et al. Integrated  
782 pathogen load and dual transcriptome analysis of systemic host-pathogen interactions in severe  
783 malaria. *Sci Transl Med*. 2018;10(447).
- 784 19. Idaghdour Y, Quinlan J, Goulet JP, Berghout J, Gbeha E, Bruat V, et al. Evidence for additive  
785 and interaction effects of host genotype and infection in malaria. *Proc Natl Acad Sci USA*.  
786 2012;109(42):16786-93.

- 787 20. Boldt ABW, van Tong H, Grobusch MP, Kalmbach Y, Dzeing Ella A, Kombila M, et al. The  
788 blood transcriptome of childhood malaria. *EBioMedicine*. 2019;40:614-25.
- 789 21. Krishna S, Waller DW, ter Kuile F, Kwiatkowski D, Crawley J, Craddock CF, et al. Lactic  
790 acidosis and hypoglycaemia in children with severe malaria: pathophysiological and prognostic  
791 significance. *Trans R Soc Trop Med Hyg*. 1994;88(1):67-73.
- 792 22. Wassmer SC, Taylor TE, Rathod PK, Mishra SK, Mohanty S, Arevalo-Herrera M, et al.  
793 Investigating the Pathogenesis of Severe Malaria: A Multidisciplinary and Cross-Geographical  
794 Approach. *Am J Trop Med Hyg*. 2015;93(3 Suppl):42-56.
- 795 23. Okiro EA, Al-Taiar A, Reyburn H, Idro R, Berkley JA, Snow RW. Age patterns of severe  
796 paediatric malaria and their relationship to *Plasmodium falciparum* transmission intensity. *Malar J*.  
797 2009;8:4.
- 798 24. Driss A, Hibbert JM, Wilson NO, Iqbal SA, Adamkiewicz TV, Stiles JK. Genetic  
799 polymorphisms linked to susceptibility to malaria. *Malar J*. 2011;10:271.
- 800 25. Wang Z, Gerstein M, Snyder M. RNA-Seq: a revolutionary tool for transcriptomics. *Nat Rev*  
801 *Genet*. 2009;10(1):57-63.
- 802 26. Cunnington AJ, Bretscher MT, Nogaro SI, Riley EM, Walther M. Comparison of parasite  
803 sequestration in uncomplicated and severe childhood *Plasmodium falciparum* malaria. *J Infect*.  
804 2013;67(3):220-30.
- 805 27. Totino PR, Magalhaes AD, Silva LA, Banic DM, Daniel-Ribeiro CT, Ferreira-da-Cruz Mde  
806 F. Apoptosis of non-parasitized red blood cells in malaria: a putative mechanism involved in the  
807 pathogenesis of anaemia. *Malar J*. 2010;9:350.
- 808 28. Couper KN, Blount DG, Hafalla JC, van Rooijen N, de Souza JB, Riley EM. Macrophage-  
809 mediated but gamma interferon-independent innate immune responses control the primary wave of  
810 *Plasmodium yoelii* parasitemia. *Infect Immun*. 2007;75(12):5806-18.
- 811 29. Yoeli M, Hargreaves BJ. Brain capillary blockage produced by a virulent strain of rodent  
812 malaria. *Science*. 1974;184(4136):572-3.
- 813 30. Moxon CA, Gibbins MP, McGuinness D, Milner DA, Jr., Marti M. New Insights into Malaria  
814 Pathogenesis. *Annu Rev Pathol*. 2020;15:315-43.

- 815 31. Georgiadou A, Naidu P, Walsh S, Kamiza S, Barrera V, Harding SP, et al. Localized release  
816 of matrix metalloproteinase 8 in fatal cerebral malaria. *Clinical & Translational Immunology*.
- 817 32. Stuart JM, Segal E, Koller D, Kim SK. A gene-coexpression network for global discovery of  
818 conserved genetic modules. *Science*. 2003;302(5643):249-55.
- 819 33. Zheng-Bradley X, Rung J, Parkinson H, Brazma A. Large scale comparison of global gene  
820 expression patterns in human and mouse. *Genome Biol*. 2010;11(12):R124.
- 821 34. Liao BY, Zhang J. Null mutations in human and mouse orthologs frequently result in  
822 different phenotypes. *Proc Natl Acad Sci USA*. 2008;105(19):6987-92.
- 823 35. Bugelski PJ, Martin PL. Concordance of preclinical and clinical pharmacology and  
824 toxicology of therapeutic monoclonal antibodies and fusion proteins: cell surface targets. *Br J*  
825 *Pharmacol*. 2012;166(3):823-46.
- 826 36. Hunig T. The storm has cleared: lessons from the CD28 superagonist TGN1412 trial. *Nat Rev*  
827 *Immunol*. 2012;12(5):317-8.
- 828 37. Shay T, Jovic V, Zuk O, Rothamel K, Puyraimond-Zemmour D, Feng T, et al. Conservation  
829 and divergence in the transcriptional programs of the human and mouse immune systems. *Proc Natl*  
830 *Acad Sci USA*. 2013;110(8):2946-51.
- 831 38. Seok J, Warren HS, Cuenca AG, Mindrinos MN, Baker HV, Xu W, et al. Genomic responses  
832 in mouse models poorly mimic human inflammatory diseases. *Proc Natl Acad Sci USA*.  
833 2013;110(9):3507-12.
- 834 39. Percie du Sert N, Hurst V, Ahluwalia A, Alam S, Avey MT, Baker M, et al. The ARRIVE  
835 guidelines 2.0: Updated guidelines for reporting animal research. *BMC Vet Res*. 2020;16(1):242.
- 836 40. Normand R, Du W, Briller M, Gaujoux R, Starosvetsky E, Ziv-Kenet A, et al. Found In  
837 Translation: a machine learning model for mouse-to-human inference. *Nat Methods*.  
838 2018;15(12):1067-73.
- 839 41. Meyer A, Paroni F, Gunther K, Dharmadhikari G, Ahrens W, Kelm S, et al. Evaluation of  
840 Existing Methods for Human Blood mRNA Isolation and Analysis for Large Studies. *PLoS One*.  
841 2016;11(8):e0161778.

- 842 42. Aurrecochea C, Brestelli J, Brunk BP, Dommer J, Fischer S, Gajria B, et al. PlasmoDB: a  
843 functional genomic database for malaria parasites. *Nucleic Acids Res.* 2009;37(Database issue):D539-  
844 43.
- 845 43. Andrew, S. FastQC: A Quality Control Tool for High Throughput Sequence Data. (2010).
- 846 44. Wingett SW, Andrews S. FastQ Screen: A tool for multi-genome mapping and quality  
847 control. *F1000Res.* 2018;7:1338.
- 848 45. Martin M. Cutadapt removes adapter sequences from high-throughput sequencing reads.  
849 2011. 2011;17(1):3.
- 850 46. Dobin A, Davis CA, Schlesinger F, Drenkow J, Zaleski C, Jha S, et al. STAR: ultrafast  
851 universal RNA-seq aligner. *Bioinformatics.* 2013;29(1):15-21.
- 852 47. Anders S, Pyl PT, Huber W. HTSeq--a Python framework to work with high-throughput  
853 sequencing data. *Bioinformatics.* 2015;31(2):166-9.
- 854 48. Durinck S, Spellman PT, Birney E, Huber W. Mapping identifiers for the integration of  
855 genomic datasets with the R/Bioconductor package biomaRt. *Nat Protoc.* 2009;4(8):1184-91.
- 856 49. Durinck S, Moreau Y, Kasprzyk A, Davis S, De Moor B, Brazma A, et al. BioMart and  
857 Bioconductor: a powerful link between biological databases and microarray data analysis.  
858 *Bioinformatics.* 2005;21(16):3439-40.
- 859 50. Nallandhighal S, Park GS, Ho YY, Opoka RO, John CC, Tran TM. Whole-Blood  
860 Transcriptional Signatures Composed of Erythropoietic and NRF2-Regulated Genes Differ Between  
861 Cerebral Malaria and Severe Malarial Anemia. *J Infect Dis.* 2019;219(1):154-64.
- 862 51. Chikina M, Zaslavsky E, Sealfon SC. CellCODE: a robust latent variable approach to  
863 differential expression analysis for heterogeneous cell populations. *Bioinformatics.*  
864 2015;31(10):1584-91.
- 865 52. Allantaz F, Cheng DT, Bergauer T, Ravindran P, Rossier MF, Ebeling M, et al. Expression  
866 profiling of human immune cell subsets identifies miRNA-mRNA regulatory relationships correlated  
867 with cell type specific expression. *PLoS One.* 2012;7(1):e29979.

868 53. Smyth GK. limma: Linear Models for Microarray Data. In: Gentleman R, Carey VJ, Huber  
869 W, Irizarry RA, Dudoit S, editors. Bioinformatics and Computational Biology Solutions Using R and  
870 Bioconductor. New York, NY: Springer New York; 2005. p. 397-420.

871 54. Vu VQ. ggbiplot: A ggplot2 based biplot. R package version 0.55 ed2011.

872 55. Mundt AKaF. factoextra: Extract and Visualize the Results of Multivariate Data Analyses. R  
873 package version 1.0.7 ed2020.

874 56. Lê S, Josse J, Husson F. FactoMineR: An R Package for Multivariate Analysis. 2008.  
875 2008;25(1):18.

876 57. Gregory R. Warnes BB, Lodewijk Bonebakker, Robert Gentleman, Wolfgang Huber, Andy  
877 Liaw, Thomas Lumley, Martin Maechler, Arni Magnusson, Steffen Moeller, Marc Schwartz, Bill  
878 Venables. gplots: Various R Programming Tools for Plotting Data. R package version 3.0.3 ed2020.

879

## 880 **Supplementary figure legends**

881

### 882 **Supplementary Figure 1: Gating strategy for defining WBC proportions in mouse blood**

883 The strategy included gating around the WBC population excluding red blood cells that did  
884 not lyse and debris using FSC-A/SSC-A. Then doublets were excluded with FSC-A and FSC-  
885 H. Using different combinations of antibodies or antibody/ SSC-A proportions of the  
886 populations of interest were defined. T cells gating: CD3 +, CD19-; T helper cells: CD8a- ,  
887 CD4+; cytotoxic T cells: CD8a+, CD4-; B cells: CD3-, CD19+; Monocytes: CD11b +, Ly-  
888 6G-; Neutrophils: Ly-6G+, CD11b +.

889

### 890 **Supplementary Figure 2: Leucocyte proportions measured in whole blood by flow** 891 **cytometry.**

892 8-week-old female wild type C57BL/6 mice infected with: *P. yoelii* 17XL, *P. berghei* ANKA,  
893 *P. berghei* NK65, *P. yoelii* 17XNL, *P. chabaudi* AS, and uninfected controls are presented  
894 here. Proportions of B cells, monocytes, neutrophils, T helper cells and cytotoxic T cells were  
895 measured at the early and late time point of each infection and compared to uninfected mice.  
896 n=3 for early and n=3 for late time point in each mouse model; n=3 for uninfected mice. Bars  
897 show mean with 95% CI. The mouse model abbreviations are as follows: PbNK65 (*P.*  
898 *berghei* NK65), PbANKA (*P. berghei* ANKA), PcAS (*P. chabaudi* AS), Py17XL (*P. yoelii*  
899 *17XL*) and Py17XNL (*P. yoelii* 17XNL).

900

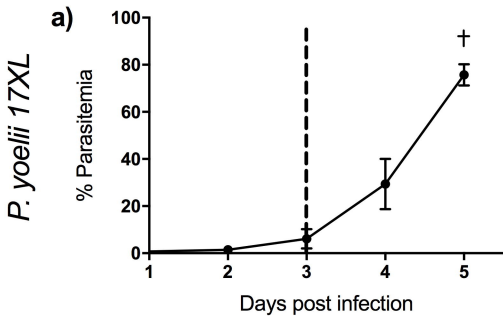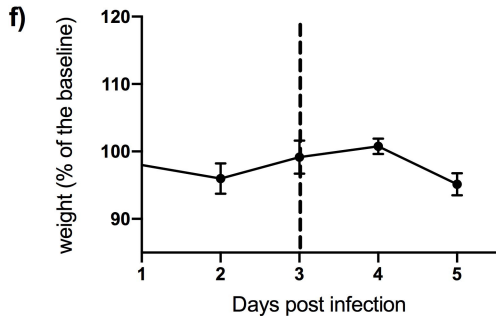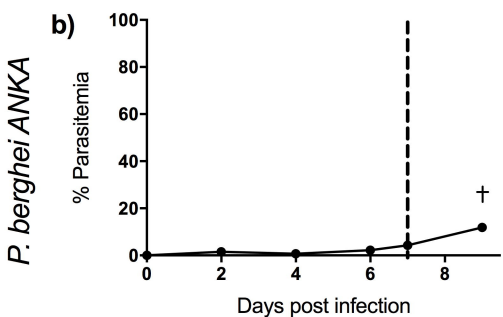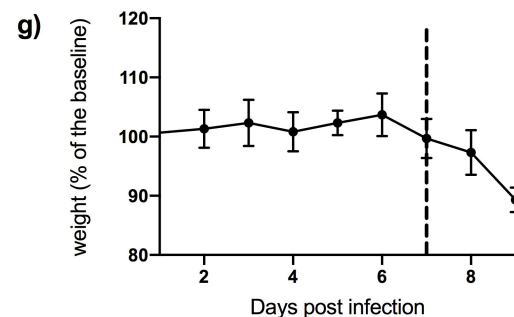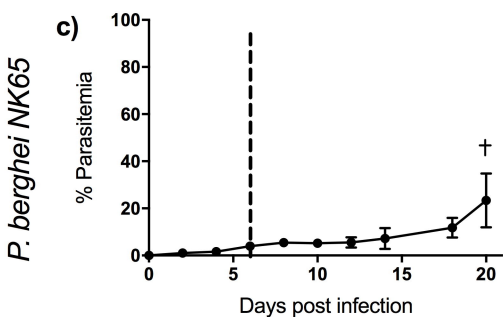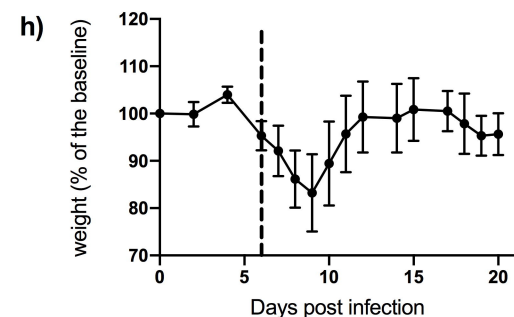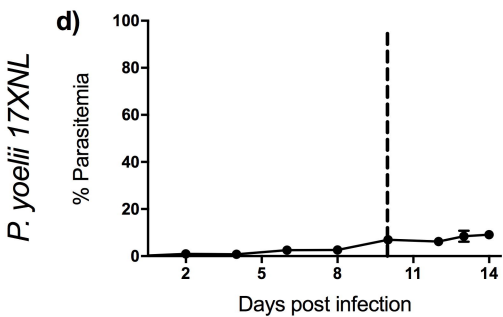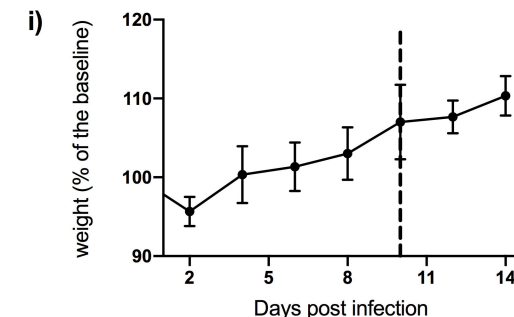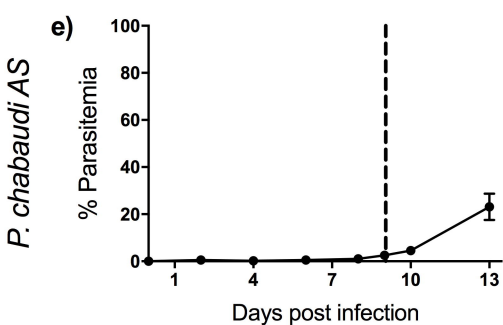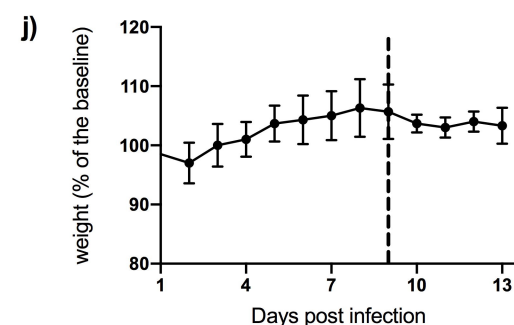

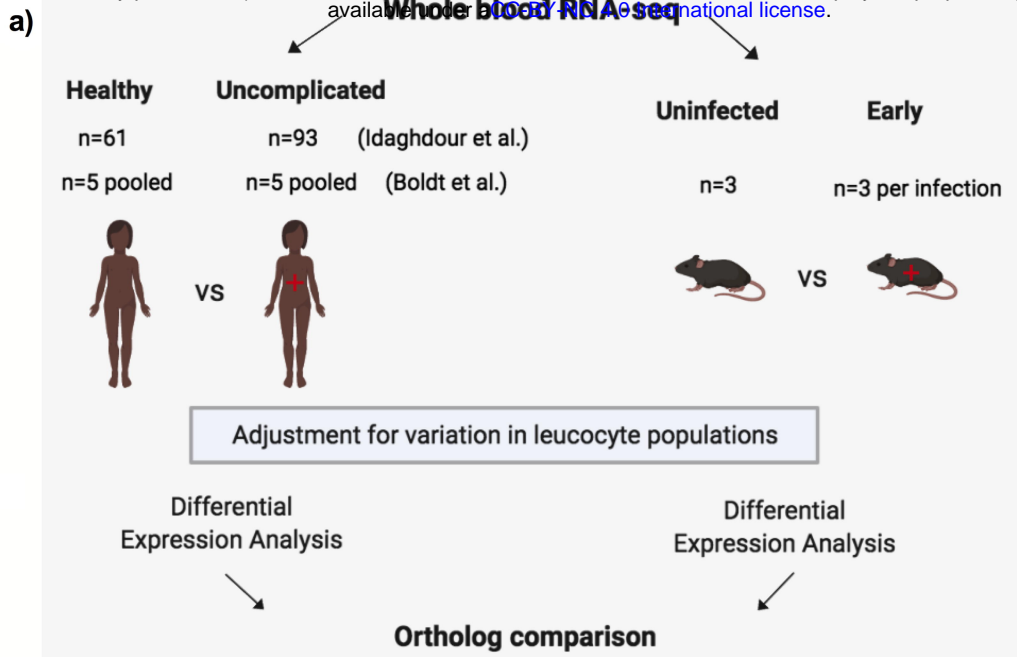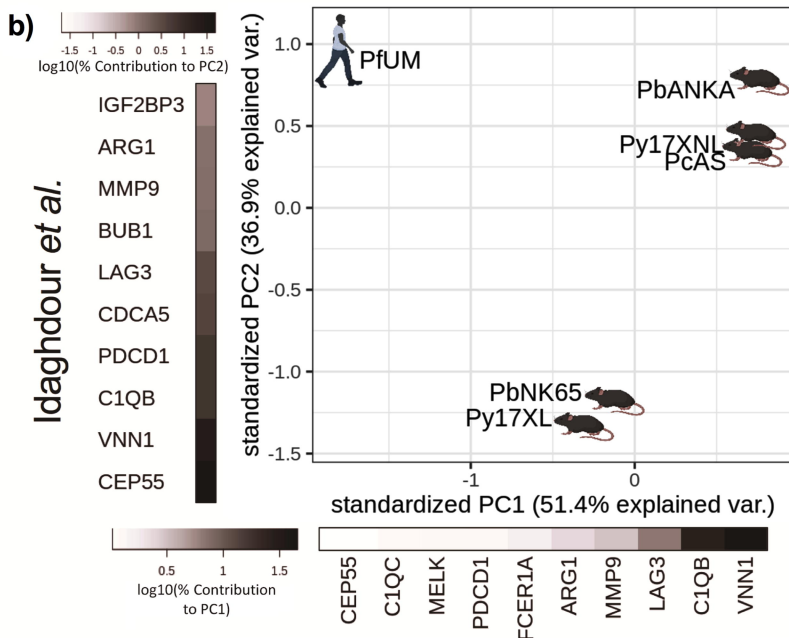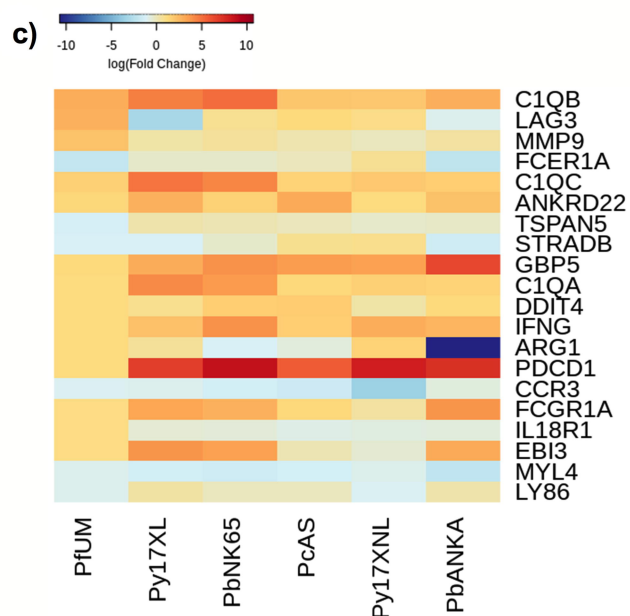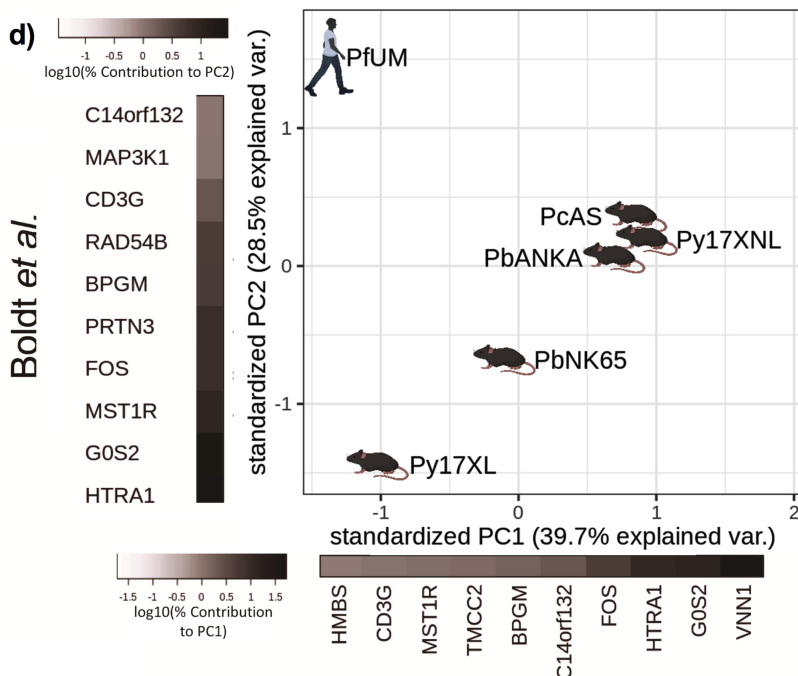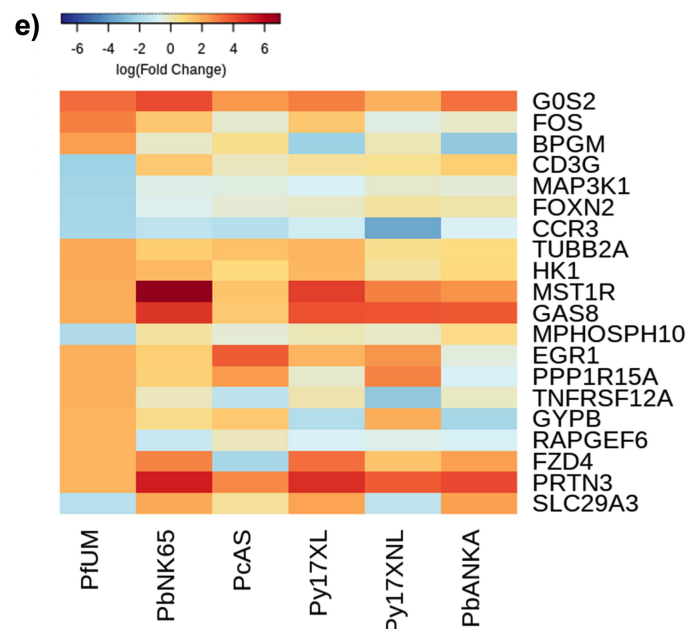



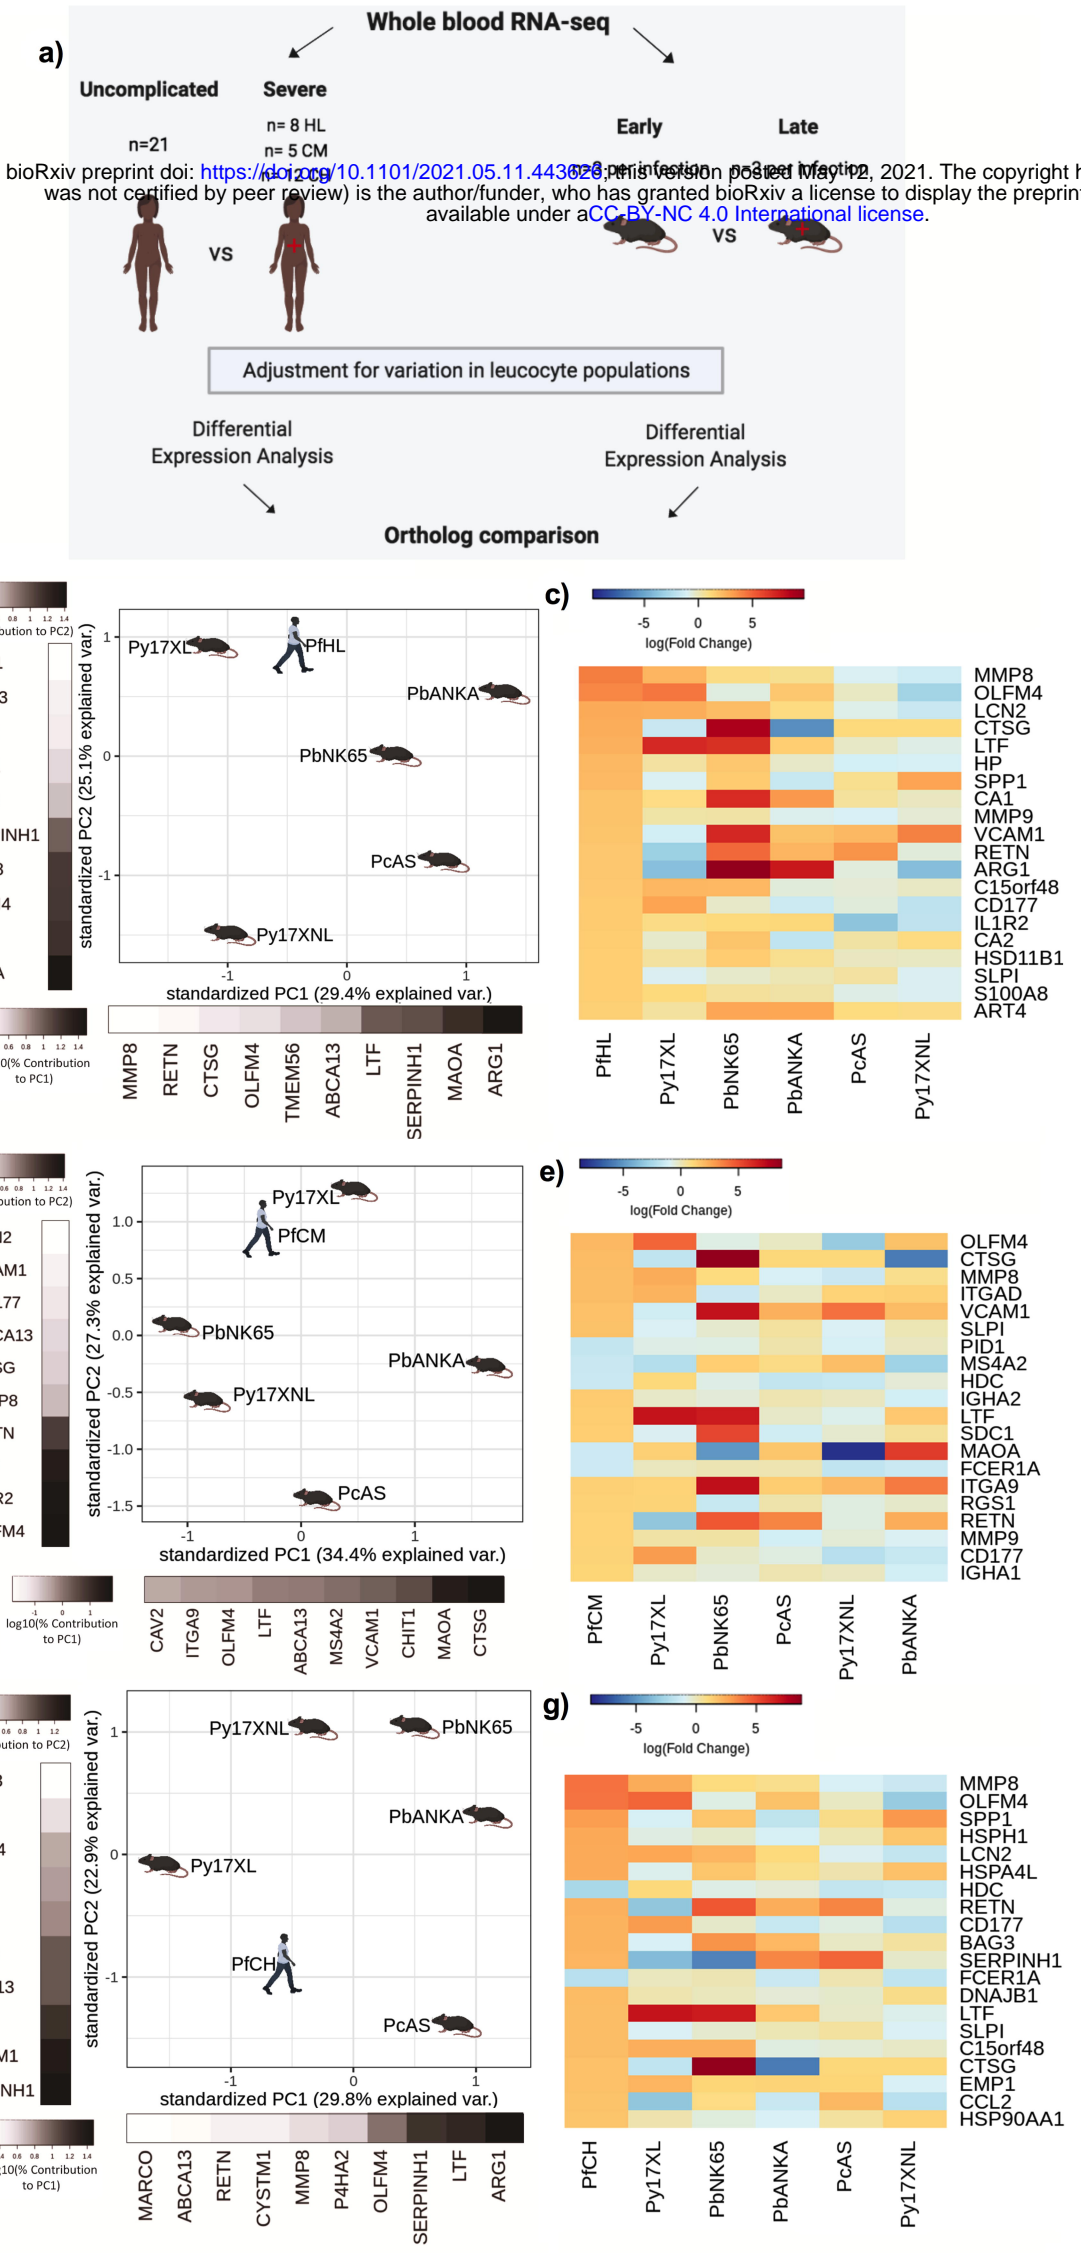

### Cerebral Malaria

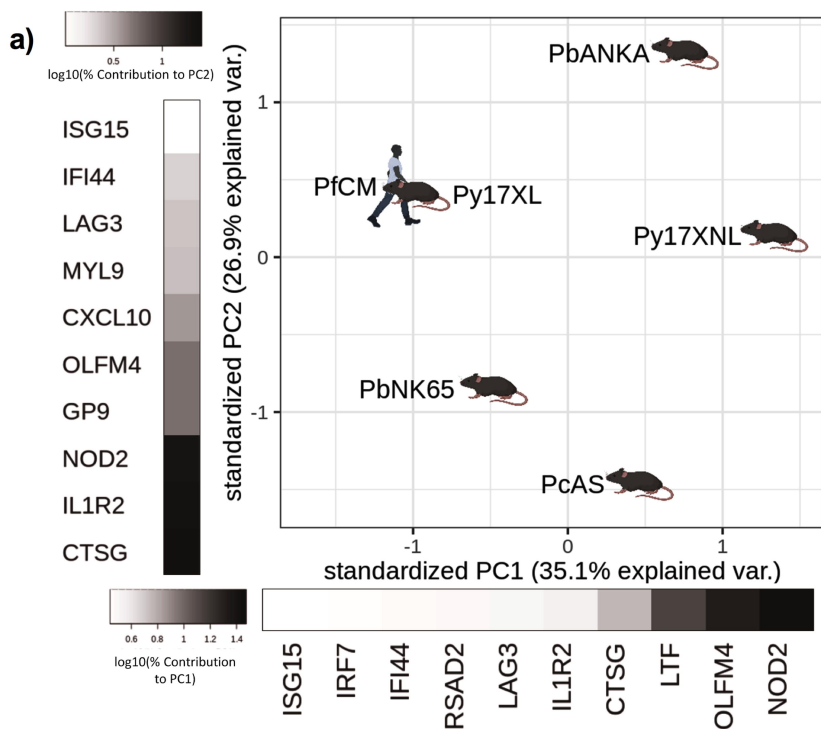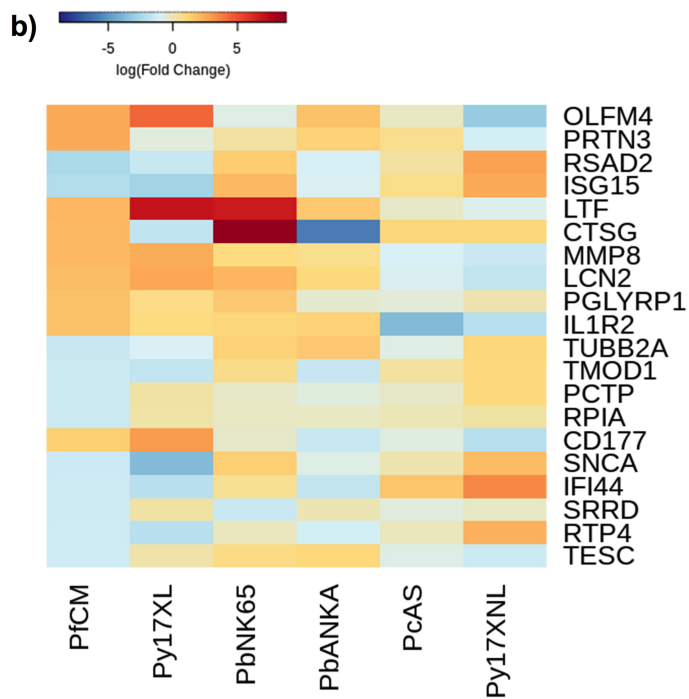

### Severe Anemia

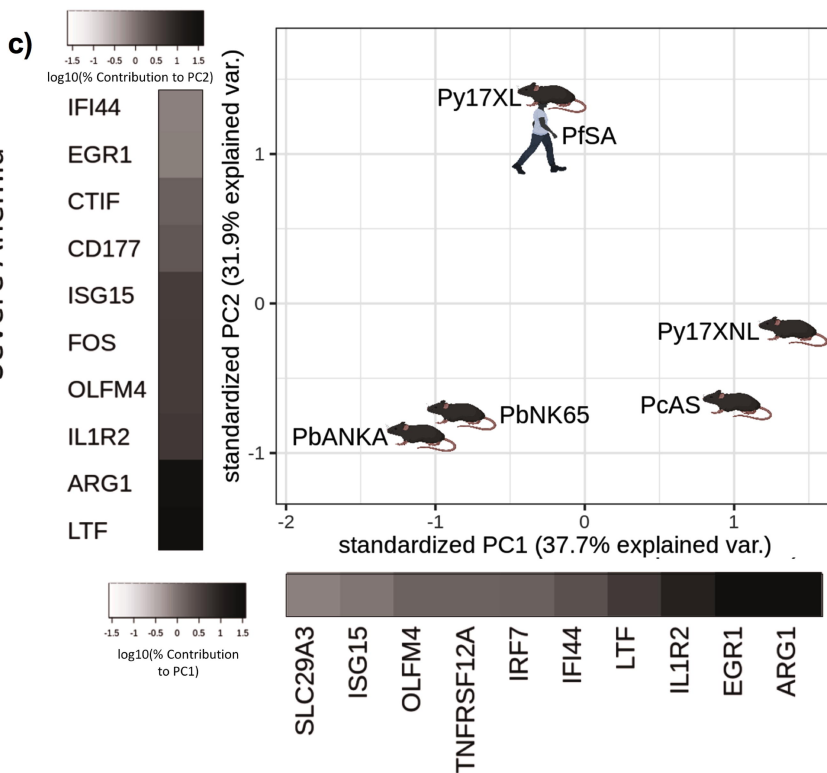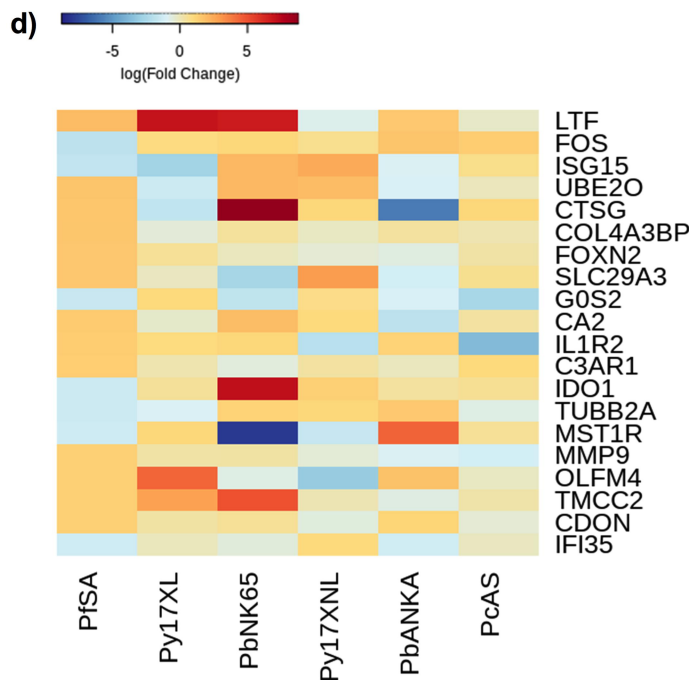

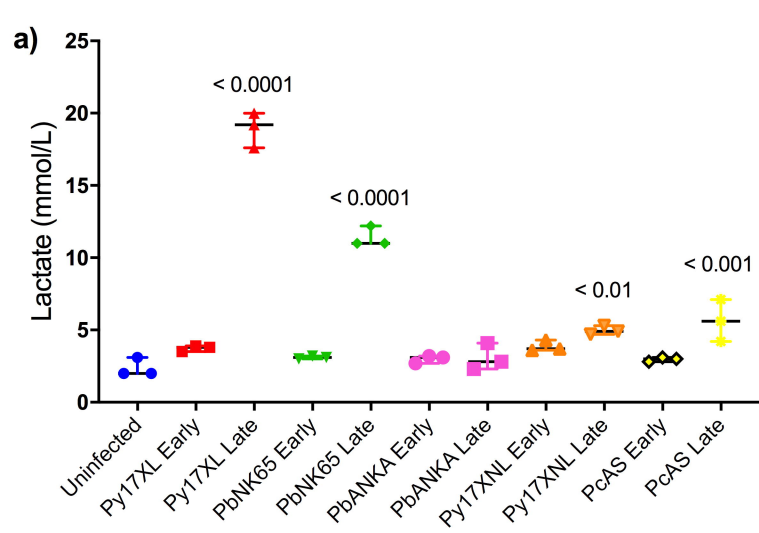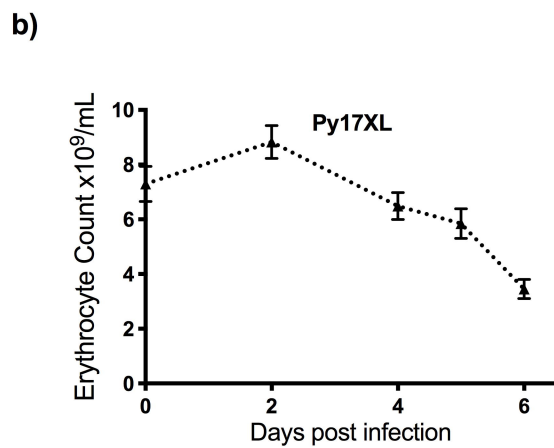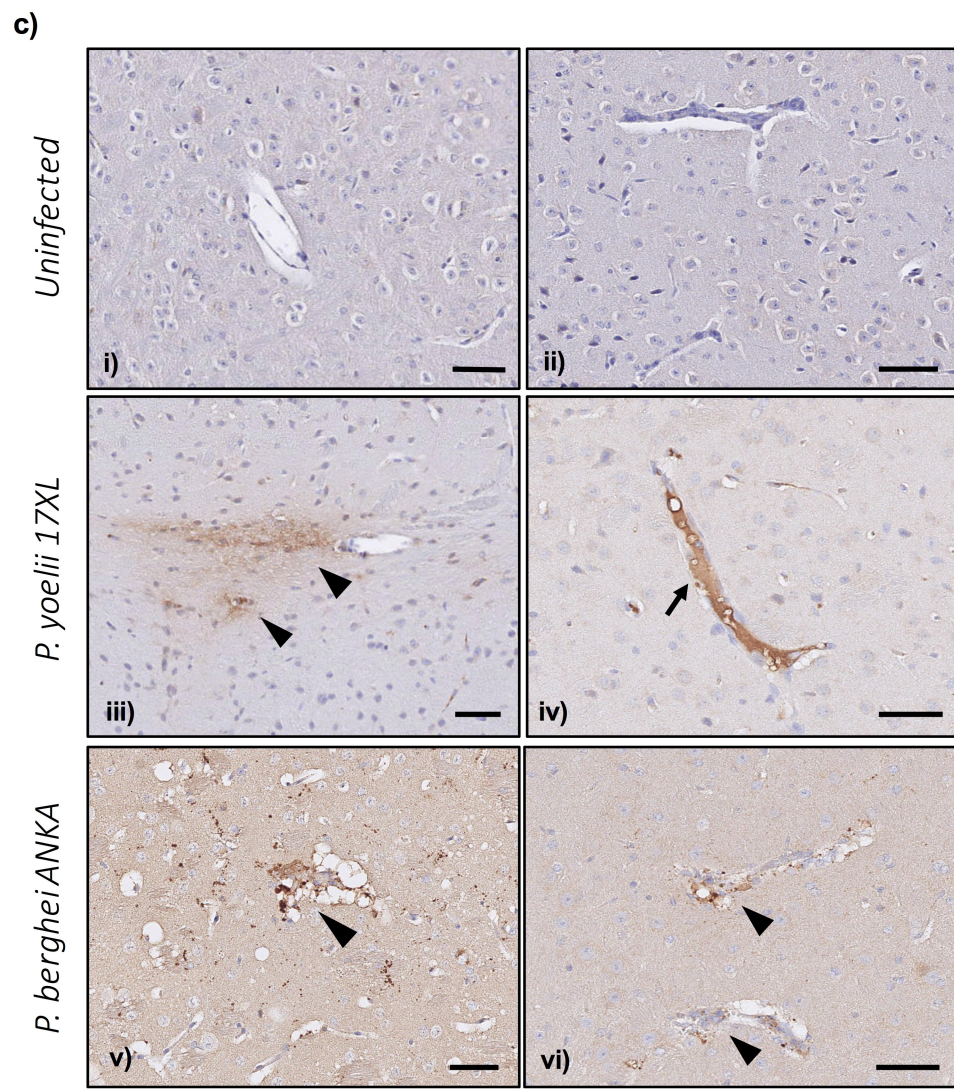

Source: http://biorxiv.org/content/10.1101/2021.05.11.443626v1.full.pdf
